# Supplementary material
Source: publisher figshare collection journal article supplement (https://aacr.figshare.com/articles/dataset/_/22478754)
Supplement: Supplementary file 1 [file 39930252]

**Safety and Immunogenicity of LY3415244, a Bispecific Antibody Against TIM-3 and PD-L1, in Patients With Advanced Solid Tumors**

**Supplemental Table 2. Dose Exposure**

|                           | <b>Cohort A1<sup>a</sup></b><br><b>(3 mg)</b><br><b>N = 3</b> | <b>Cohort A2</b><br><b>(10 mg)</b><br><b>N = 3</b> | <b>Cohort A3<sup>a</sup></b><br><b>(30 mg)</b><br><b>N = 3</b> | <b>Cohort A4<sup>b</sup></b><br><b>(70 mg)</b><br><b>N = 3</b> |
|---------------------------|---------------------------------------------------------------|----------------------------------------------------|----------------------------------------------------------------|----------------------------------------------------------------|
| Cycles received, n        |                                                               |                                                    |                                                                |                                                                |
| Median (IQR)              | 2 (2-6)                                                       | 4 (2-5)                                            | 4 (2-4)                                                        | 1 (1-2)                                                        |
| Duration of therapy, days |                                                               |                                                    |                                                                |                                                                |
| Median (IQR)              | 56 (42-168)                                                   | 100 (56-126)                                       | 98 (57-98)                                                     | 28 (14-42)                                                     |
| Cumulative dose, mg       |                                                               |                                                    |                                                                |                                                                |
| Median (IQR)              | 12 (9-36)                                                     | 70 (40-90)                                         | 210 (120-210)                                                  | 140 (70-210)                                                   |

Abbreviation: IQR, interquartile range.

<sup>a</sup> 1 patient in this cohort discontinued treatment due to study termination by sponsor decision.

<sup>b</sup> 3 patients in this cohort discontinued treatment due to study termination by sponsor decision.
